# Supplementary material for: Substituent effects in the so-called cation⋯π interaction of benzene and its boron–nitrogen doped analogues: overlooked role of σ-skeleton
Source: Royal Society of Chemistry journal article supplement (doi:10.1039/c8cp04962a), 2019-01-01
Supplement: c8cp04962a1.pdf [file c8cp04962a1.pdf]

# Supporting Information: Substituent Effects in the So-Called Cation · · · $\pi$ Interaction of Benzene and its Boron-Nitrogen Doped Analogues: Overlooked Role of $\sigma$ -Skeleton

Sirous Yourdkhani,<sup>\*,†,‡</sup> Michał Chojecki,<sup>\*,‡</sup> and Tatiana Korona<sup>\*,‡</sup>

<sup>†</sup>*Department of Chemical Physics and Optics, Faculty of Mathematics and Physics, Charles  
University, Ke Karlovu 3, CZ-12116 Prague 2, Czech Republic*

<sup>‡</sup>*Faculty of Chemistry, University of Warsaw, ul. Pasteura 1, 02-093 Warsaw, Poland*

E-mail: sirous@tiger.chem.uw.edu.pl; mhs@tiger.chem.uw.edu.pl; tania@chem.uw.edu.pl

Note: energies in tables and figures are in kcal/mol and delocalization indices are in a.u.

## List of Figures

- SF1 Changes in (a) the delocalization index (in a.u.) due of the 1,2-azaborine and benzene rings with  $\text{Na}^+$  calculated from the total density ( $\rho_{(\sigma+\pi+\text{Na}^+)} = \rho_{\sigma} + \rho_{\pi} + \rho_{\text{Na}^+}$ ); due to the *through-bond* effects (inductive and resonance effects). S4
- SF2 Atom-cation contributions to the changes for the IQA total Coulomb interaction energy and its components for the case of ring atoms of the cyano-substituted 1,2-azaborines: (a) 2-B(CN), (b) 2-C1(CN), (c) 2-C2(CN), (d) 2-C3(CN), (e) 2-C4(CN), and (f) 2-N(CN). S5
- SF3 Atom-cation contributions to the changes for the IQA total Coulomb interaction energy and its components for the case of ring atoms of the amino-substituted 1,2-azaborines: (a) 2-B( $\text{NH}_2$ ), (b) 2-C1( $\text{NH}_2$ ), (c) 2-C2( $\text{NH}_2$ ), (d) 2-C3( $\text{NH}_2$ ), (e) 2-C4( $\text{NH}_2$ ), and (f) 2-N( $\text{NH}_2$ ). S6
- SF4 Atom-cation contributions to the changes for the IQA total Coulomb interaction energy and its components for the case of ring atoms of the nitro-substituted 1,2-azaborines: (a) 2-B( $\text{NO}_2$ ), (b) 2-C1( $\text{NO}_2$ ), (c) 2-C2( $\text{NO}_2$ ), (d) 2-C3( $\text{NO}_2$ ), (e) 2-C4( $\text{NO}_2$ ), and (f) 2-N( $\text{NO}_2$ ). S7
- SF5 Atom-cation contributions to the changes for the IQA total Coulomb interaction energy and its components for the case of ring atoms of the hydroxy-substituted 1,2-azaborines: (a) 2-B(OH), (b) 2-C1(OH), (c) 2-C2(OH), (d) 2-C3(OH), (e) 2-C4(OH), and (f) 2-N(OH). S8
- SF6 Difference F-SAPT/jun-cc-pVDZ analysis for the considered systems – less important contributions not included in the main text. Energies are in kcal/mol. S9

## List of Tables

|      |                                                                                                                                                                                        |     |
|------|----------------------------------------------------------------------------------------------------------------------------------------------------------------------------------------|-----|
| ST1  | IQA components of complexes of the fluoro-substituted 1,2-azaborines with Na <sup>+</sup> calculated from the total ( $\sigma+\pi+\text{Na}^+$ ) HF densities.                         | S11 |
| ST2  | IQA components of complexes of the fluoro-substituted 1,2-azaborines with Na <sup>+</sup> calculated from the $\sigma$ , $\pi$ , and Na <sup>+</sup> parts of the total HF densities.  | S12 |
| ST3  | IQA components of complexes of the cyano-substituted 1,2-azaborines with Na <sup>+</sup> calculated from the total ( $\sigma+\pi+\text{Na}^+$ ) HF densities.                          | S14 |
| ST4  | IQA components of complexes of the cyano-substituted 1,2-azaborines with Na <sup>+</sup> calculated from the $\sigma$ , $\pi$ , and Na <sup>+</sup> parts of the total HF densities.   | S15 |
| ST5  | IQA components of complexes of the amino-substituted 1,2-azaborines with Na <sup>+</sup> calculated from the total ( $\sigma+\pi+\text{Na}^+$ ) HF densities.                          | S17 |
| ST6  | IQA components of complexes of the amino-substituted 1,2-azaborines with Na <sup>+</sup> calculated from the $\sigma$ , $\pi$ , and Na <sup>+</sup> parts of the total HF densities.   | S18 |
| ST7  | IQA components of complexes of the nitro-substituted 1,2-azaborines with Na <sup>+</sup> calculated from the total ( $\sigma+\pi+\text{Na}^+$ ) HF densities.                          | S19 |
| ST8  | IQA components of complexes of the nitro-substituted 1,2-azaborines with Na <sup>+</sup> calculated from the $\sigma$ , $\pi$ and Na <sup>+</sup> parts of the total HF densities.     | S20 |
| ST9  | IQA components of complexes of the hydroxy-substituted 1,2-azaborines with Na <sup>+</sup> calculated from the total ( $\sigma+\pi+\text{Na}^+$ ) HF densities.                        | S21 |
| ST10 | IQA components of complexes of the hydroxy-substituted 1,2-azaborines with Na <sup>+</sup> calculated from the $\sigma$ , $\pi$ , and Na <sup>+</sup> parts of the total HF densities. | S22 |
| ST11 | IQA components of complexes of benzene and its substituted derivatives with Na <sup>+</sup> calculated from the total ( $\sigma+\pi+\text{Na}^+$ ) HF densities.                       | S24 |
| ST12 | IQA components of complexes of benzene and its substituted derivatives with Na <sup>+</sup> from the $\sigma$ , $\pi$ , and Na <sup>+</sup> parts of the total HF densities.           | S26 |

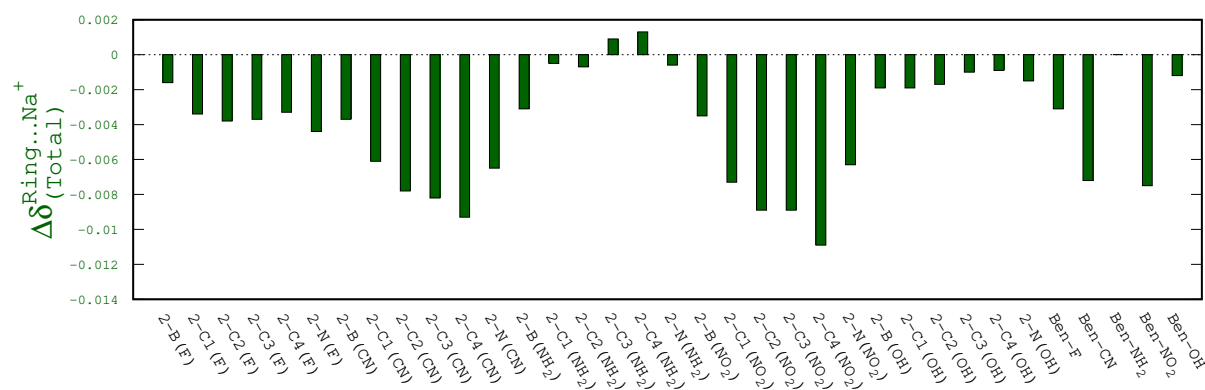

Figure SF1: Changes in the delocalization index (in a.u.) due of the 1,2-azaborine and benzene rings with  $\text{Na}^+$  calculated from the total density ( $\rho_{(\sigma+\pi+\text{Na}^+)} = \rho_{\sigma} + \rho_{\pi} + \rho_{\text{Na}^+}$ ) due to the *through-bond* effects (inductive and resonance effects).

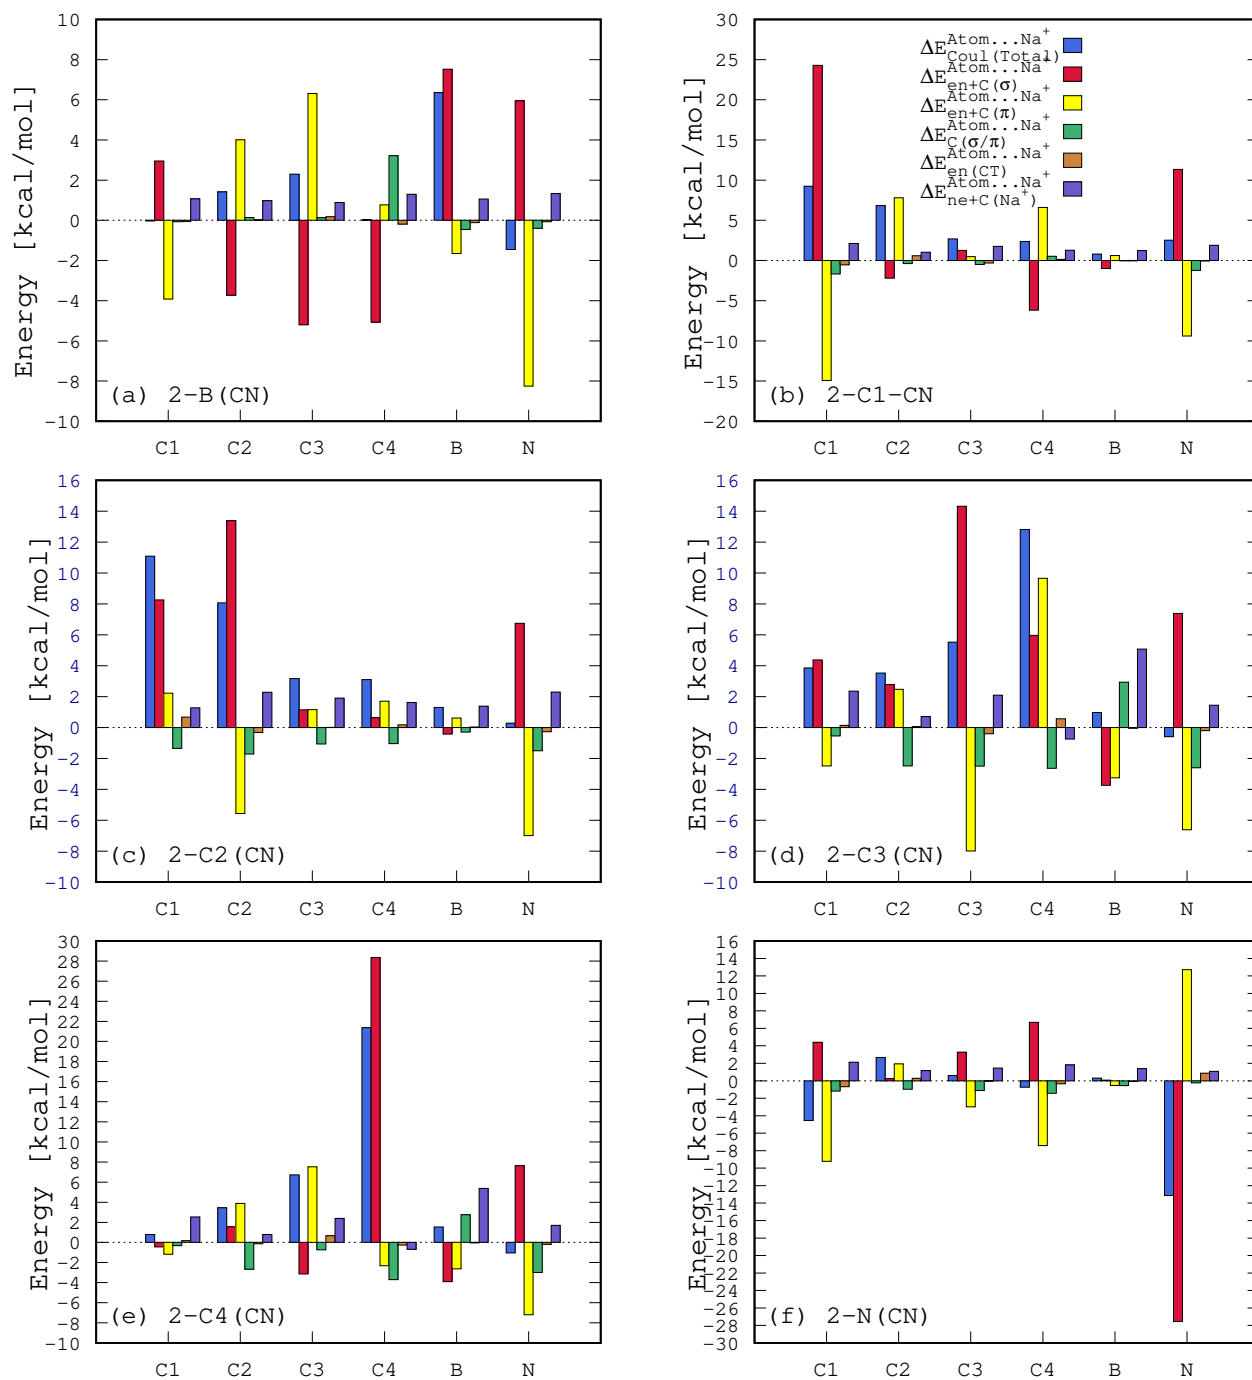

Figure SF2: Atom-cation contributions to the changes for the IQA total Coulomb interaction energy and its components for the case of ring atoms of the cyano-substituted 1,2-azaborines: (a) 2-B(CN), (b) 2-C1(CN), (c) 2-C2(CN), (d) 2-C3(CN), (e) 2-C4(CN), and (f) 2-N(CN).

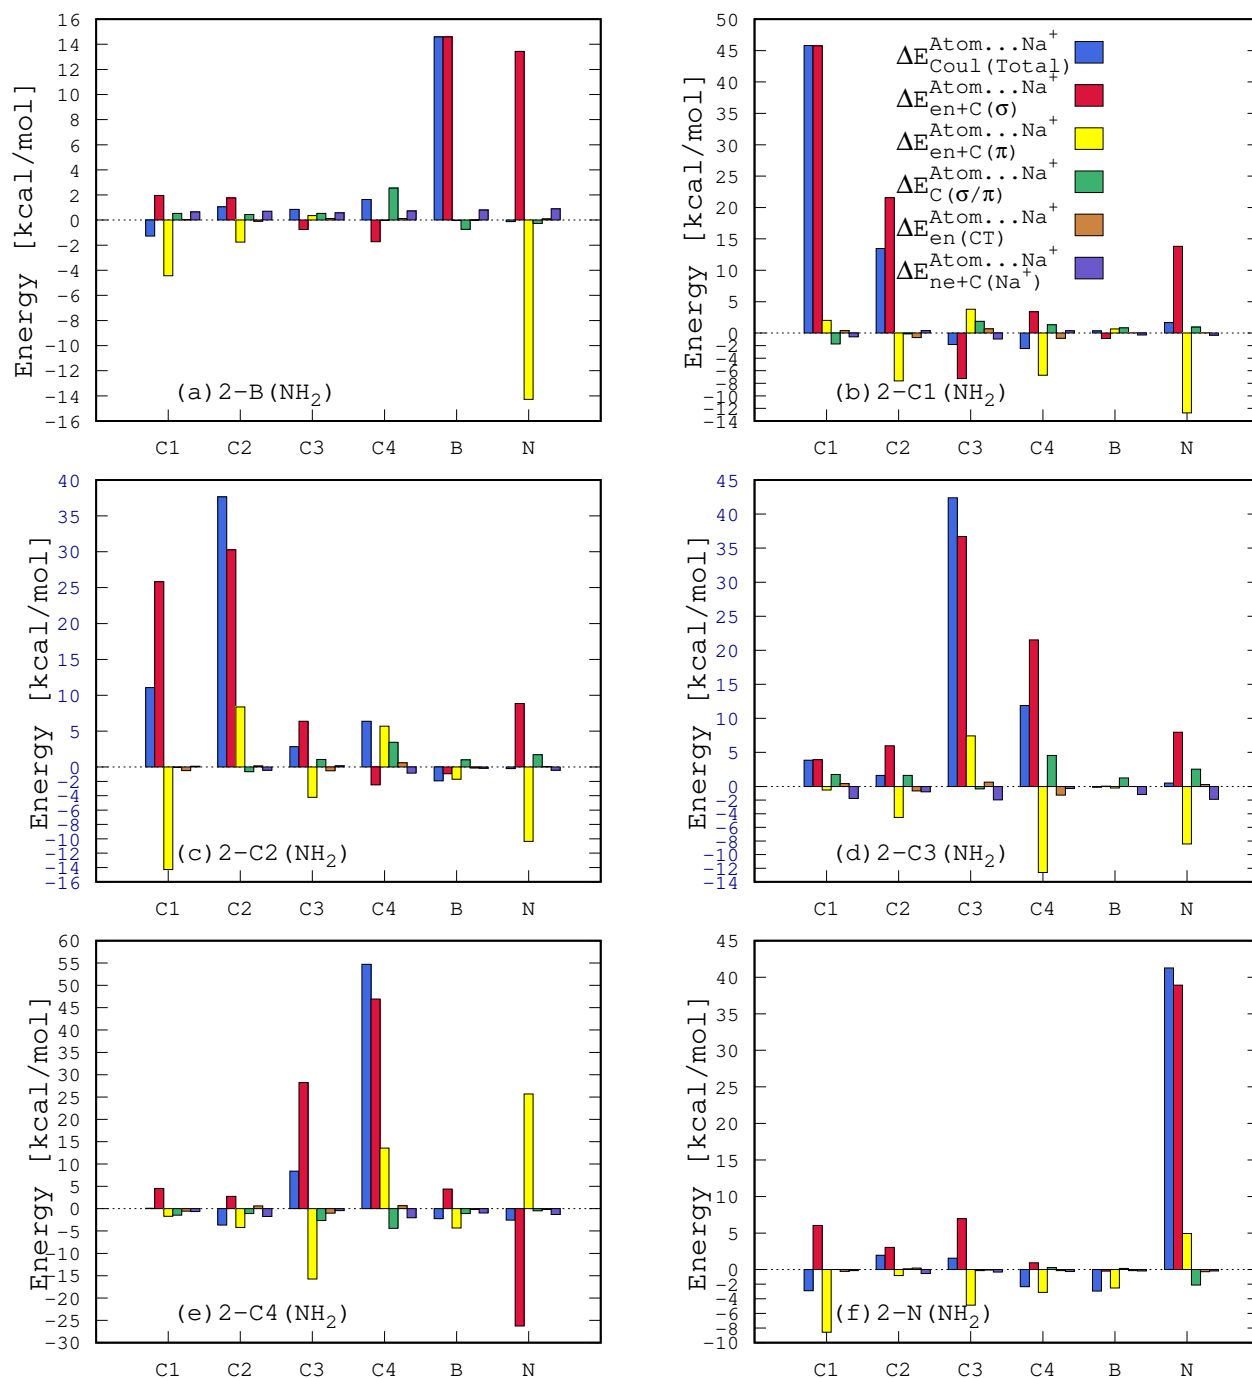

Figure SF3: Atom-cation contributions to the changes for the IQA total Coulomb interaction energy and its components for the case of ring atoms of the amino-substituted 1,2-azaborines: (a) 2-B(NH<sub>2</sub>), (b) 2-C1(NH<sub>2</sub>), (c) 2-C2(NH<sub>2</sub>), (d) 2-C3(NH<sub>2</sub>), (e) 2-C4(NH<sub>2</sub>), and (f) 2-N(NH<sub>2</sub>).

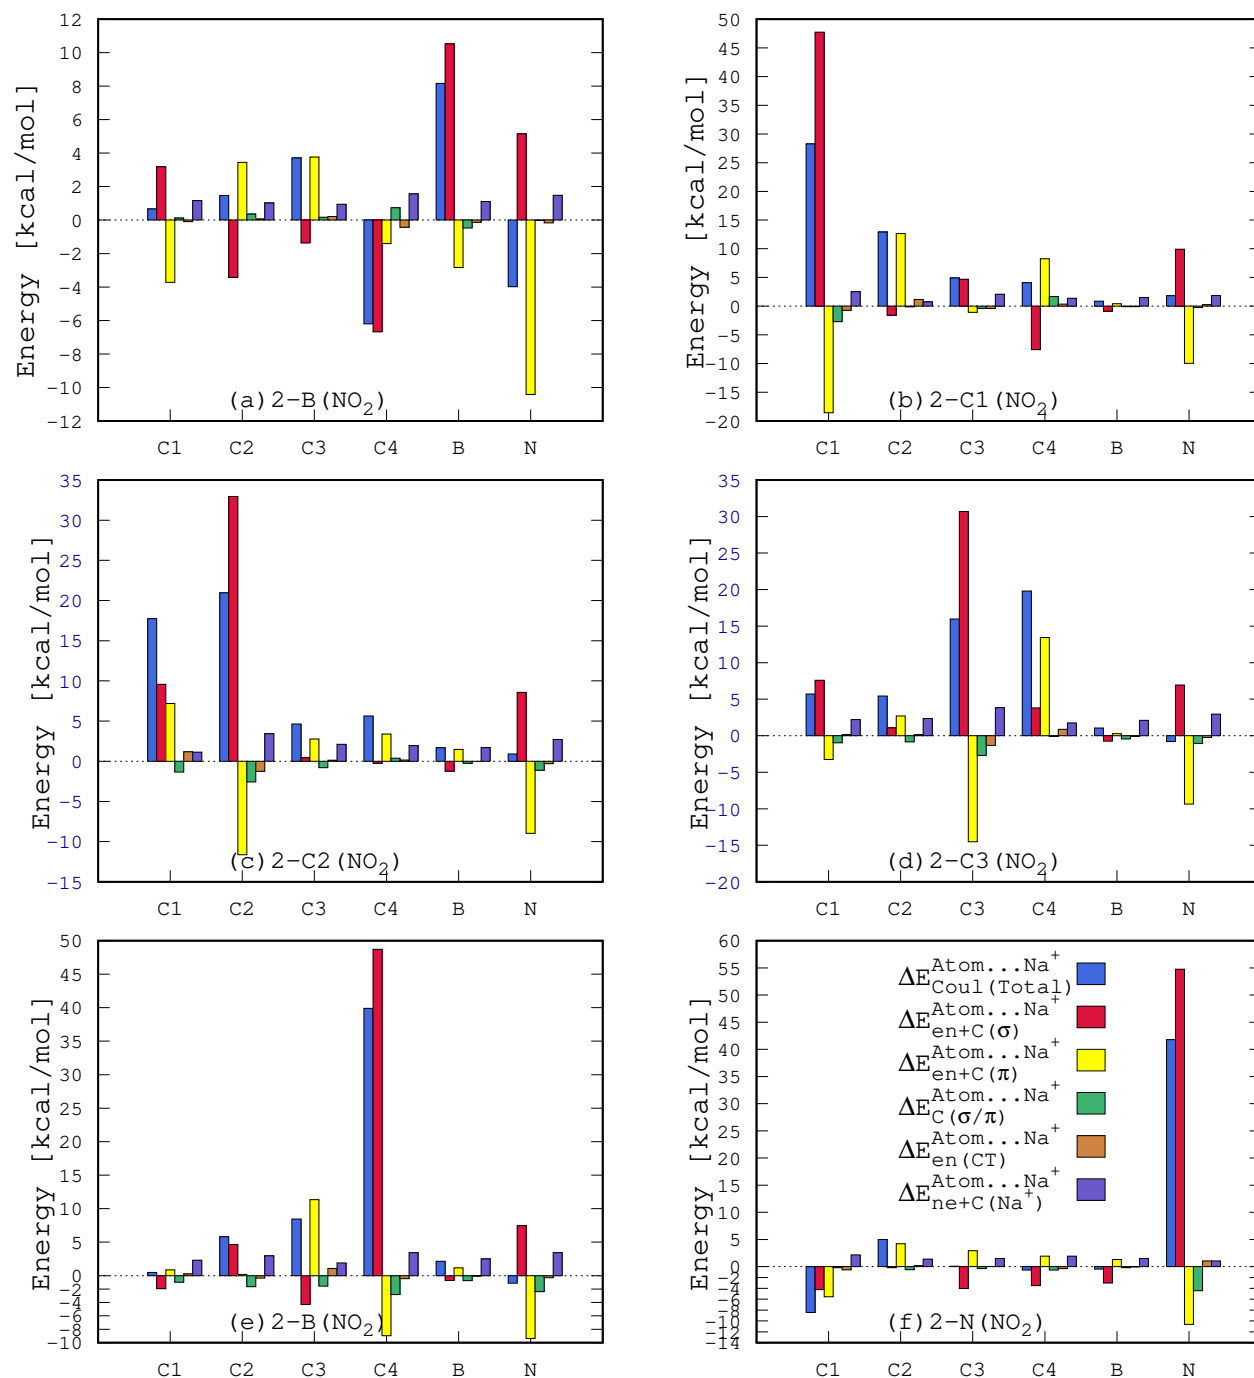

Figure SF4: Atom-cation contributions to the changes for the IQA total Coulomb interaction energy and its components for the case of ring atoms of the nitro-substituted 1,2-azaborines: (a) 2-B(NO<sub>2</sub>), (b) 2-C1(NO<sub>2</sub>), (c) 2-C2(NO<sub>2</sub>), (d) 2-C3(NO<sub>2</sub>), (e) 2-C4(NO<sub>2</sub>), and (f) 2-N(NO<sub>2</sub>).

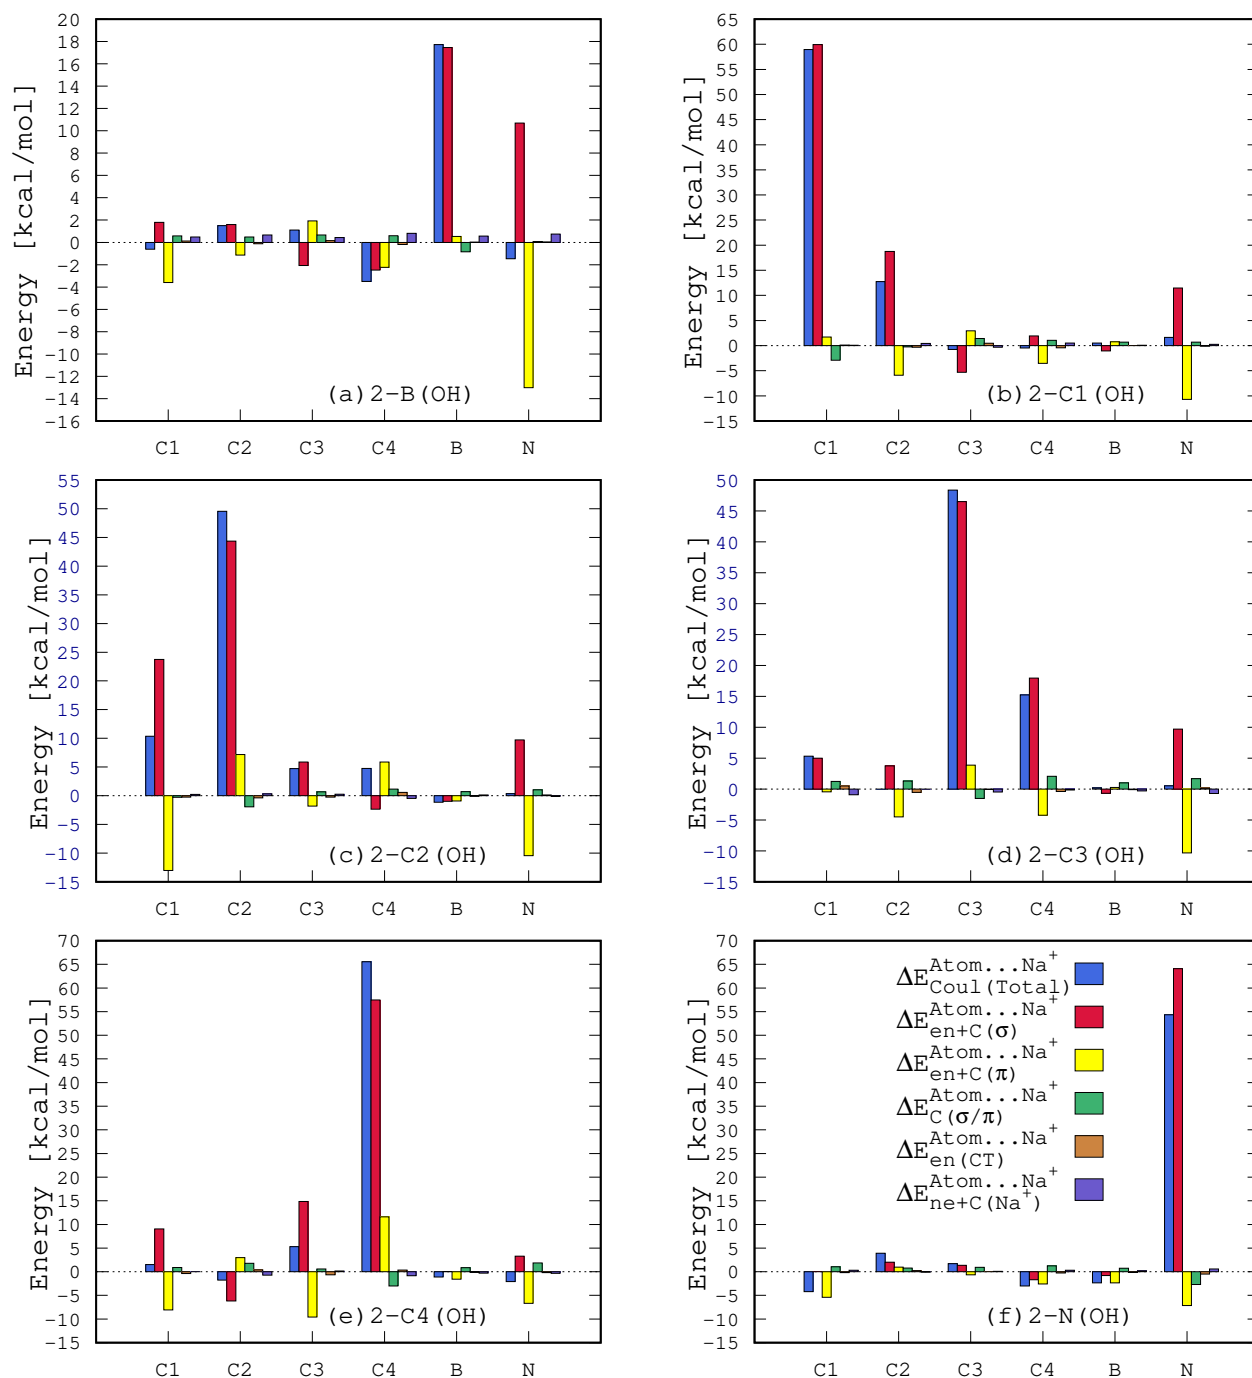

Figure SF5: Atom-cation contributions to the changes for the IQA total Coulomb interaction energy and its components for the case of ring atoms of the hydroxy-substituted 1,2-azaborines: (a) 2-B(OH), (b) 2-C1(OH), (c) 2-C2(OH), (d) 2-C3(OH), (e) 2-C4(OH), and (f) 2-N(OH).







Table ST1: IQA components of complexes of the fluoro-substituted 1,2-azaborines with  $\text{Na}^+$  calculated from the total  $(\sigma + \pi + \text{Na}^+)$  HF densities.

| Complexes                        | Ring...Na <sup>+</sup>                          |                                                |                                                | $\sum$ H...Na <sup>+</sup>                   |                                             |                                             | X...Na <sup>+</sup>                          |                                             |                                             | Total                           |                                |                                |                                   |        |        |        |        |        |         |       |        |        |        |        |        |
|----------------------------------|-------------------------------------------------|------------------------------------------------|------------------------------------------------|----------------------------------------------|---------------------------------------------|---------------------------------------------|----------------------------------------------|---------------------------------------------|---------------------------------------------|---------------------------------|--------------------------------|--------------------------------|-----------------------------------|--------|--------|--------|--------|--------|---------|-------|--------|--------|--------|--------|--------|
|                                  | $E_{\text{int}}^{\text{Ring}\cdots\text{Na}^+}$ | $E_{\text{CI}}^{\text{Ring}\cdots\text{Na}^+}$ | $E_{\text{XC}}^{\text{Ring}\cdots\text{Na}^+}$ | $E_{\text{int}}^{\text{H}\cdots\text{Na}^+}$ | $E_{\text{CI}}^{\text{H}\cdots\text{Na}^+}$ | $E_{\text{XC}}^{\text{H}\cdots\text{Na}^+}$ | $E_{\text{int}}^{\text{X}\cdots\text{Na}^+}$ | $E_{\text{CI}}^{\text{X}\cdots\text{Na}^+}$ | $E_{\text{XC}}^{\text{X}\cdots\text{Na}^+}$ | $E_{\text{int}}^{\text{Total}}$ | $E_{\text{CI}}^{\text{Total}}$ | $E_{\text{XC}}^{\text{Total}}$ | $\delta(\text{aza}, \text{Na}^+)$ |        |        |        |        |        |         |       |        |        |        |        |        |
| 2...Na <sup>+</sup>              | -46.07                                          | -29.80                                         | -47280.08                                      | -90794.08                                    | 43514.00                                    | 47250.28                                    | -16.28                                       | 0.1584                                      | 4.78                                        | 5.05                            | -6321.61                       | 6326.66                        | -0.27                             | 0.0045 | -41.30 | -24.75 | -16.55 | 0.1629 |         |       |        |        |        |        |        |
| 2...Na <sup>+</sup> (2.6 Å)      | 62.22                                           | 73.47                                          | -44381.09                                      | -85348.08                                    | 40966.99                                    | 44454.56                                    | -11.25                                       | 0.1186                                      | 1.53                                        | 1.74                            | -6075.44                       | 6077.18                        | -0.20                             | 0.0035 | 63.75  | 1.74   | 75.21  | 0.1221 |         |       |        |        |        |        |        |
| 2-B(F)...Na <sup>+</sup> (2.6 Å) | 97.32                                           | 108.48                                         | -44346.08                                      | -85188.67                                    | 40842.59                                    | 44454.56                                    | -11.16                                       | 0.1171                                      | 69.91                                       | 70.04                           | -5027.89                       | 5097.93                        | -0.13                             | 0.0023 | 88.76  | 100.10 | -11.34 | 0.1203 |         |       |        |        |        |        |        |
| 2-C1(F)...Na <sup>+</sup>        | 33.51                                           | 49.55                                          | -47200.74                                      | -89894.25                                    | 42693.51                                    | 47250.28                                    | -16.04                                       | 0.1550                                      | 2.69                                        | 2.93                            | -5261.36                       | 5264.29                        | -0.23                             | 0.0039 | -70.22 | -70.13 | -91.29 | 1.4    | 9059.01 | -0.09 | 0.0015 | -34.01 | -17.65 | -16.34 | 0.1604 |
| 2-C2(F)...Na <sup>+</sup>        | 27.69                                           | 43.70                                          | -47206.59                                      | -89034.09                                    | 42727.51                                    | 47250.28                                    | -16.01                                       | 0.1546                                      | 6.01                                        | 6.23                            | -5257.02                       | 5263.24                        | -0.22                             | 0.0036 | -69.77 | -69.65 | -91.16 | 48     | 9046.83 | -0.12 | 0.0020 | -36.07 | -19.72 | -16.34 | 0.1601 |
| 2-C3(F)...Na <sup>+</sup>        | 29.35                                           | 45.42                                          | -47204.87                                      | -89042.73                                    | 42727.86                                    | 47250.28                                    | -16.06                                       | 0.1547                                      | 6.37                                        | 6.60                            | -5261.76                       | 5268.36                        | -0.22                             | 0.0036 | -69.70 | -69.57 | -90.80 | 89     | 9011.32 | -0.13 | 0.0022 | -33.97 | -17.56 | -16.42 | 0.1605 |
| 2-C4(F)...Na <sup>+</sup>        | 25.80                                           | 41.89                                          | -47208.40                                      | -89958.65                                    | 42730.25                                    | 47250.28                                    | -16.09                                       | 0.1551                                      | 7.00                                        | 7.22                            | -5272.79                       | 5280.00                        | -0.21                             | 0.0034 | -68.95 | -68.89 | -89.71 | 17     | 8902.38 | -0.15 | 0.0026 | -36.14 | -19.69 | -16.45 | 0.1611 |
| 2-N(F)...Na <sup>+</sup>         | 25.09                                           | 41.05                                          | -47209.24                                      | -89963.47                                    | 42734.22                                    | 47250.28                                    | -15.96                                       | 0.1540                                      | -28.72                                      | -28.48                          | -5276.18                       | 5247.70                        | -0.24                             | 0.0040 | -31.53 | -31.47 | -90.08 | 93     | 8977.46 | -0.06 | 0.0011 | -35.17 | -18.91 | -16.26 | 0.1591 |

Table ST2: IQA components of complexes of the fluoro-substituted 1,2-azaborines with  $\text{Na}^+$  calculated from the  $\sigma$ ,  $\pi$ , and  $\text{Na}^+$  parts of the total HF densities.

| Complexes                                                | $\sigma$                                                 |                                                        |                                    | $\pi$                                                 |                                                     |                                    | $\sigma/\pi$                                              |                                                            |                                    | cation                                                        |                                                             |                                                           |
|----------------------------------------------------------|----------------------------------------------------------|--------------------------------------------------------|------------------------------------|-------------------------------------------------------|-----------------------------------------------------|------------------------------------|-----------------------------------------------------------|------------------------------------------------------------|------------------------------------|---------------------------------------------------------------|-------------------------------------------------------------|-----------------------------------------------------------|
|                                                          | $E_{\text{ne+C}(\sigma)}^{\text{Ring}\cdots\text{Na}^+}$ | $E_{\text{XC}(\sigma)}^{\text{Ring}\cdots\text{Na}^+}$ | $E_{\text{Ring}\cdots\text{Na}^+}$ | $E_{\text{ne+C}(\pi)}^{\text{Ring}\cdots\text{Na}^+}$ | $E_{\text{XC}(\pi)}^{\text{Ring}\cdots\text{Na}^+}$ | $E_{\text{Ring}\cdots\text{Na}^+}$ | $E_{\text{C}(\sigma/\pi)}^{\text{Ring}\cdots\text{Na}^+}$ | $E_{\text{XC}(\sigma/\pi)}^{\text{Ring}\cdots\text{Na}^+}$ | $E_{\text{Ring}\cdots\text{Na}^+}$ | $E_{\text{ne+C}(\text{Na}^+)}^{\text{Ring}\cdots\text{Na}^+}$ | $E_{\text{XC}(\text{Na}^+)}^{\text{Ring}\cdots\text{Na}^+}$ | $E_{\text{en}(\text{CT})}^{\text{Ring}\cdots\text{Na}^+}$ |
| $2\cdots\text{Na}^+$                                     | -3647.04                                                 | -1.18                                                  | -684.31                            | -8.84                                                 | 248.99                                              | -1.47                              | -43150.38                                                 | -4.79                                                      | -46.83                             |                                                               |                                                             |                                                           |
| $2\cdots\text{Na}^+(2.6 \text{ \AA})$                    | -3417.79                                                 | -0.62                                                  | -656.28                            | -6.93                                                 | 285.82                                              | -0.76                              | -40563.36                                                 | -2.95                                                      | -29.02                             |                                                               |                                                             |                                                           |
| $2\text{-B}(\text{F})\cdots\text{Na}^+(2.6 \text{ \AA})$ | -3395.63                                                 | -0.58                                                  | -665.76                            | -6.92                                                 | 304.77                                              | -0.69                              | -40559.76                                                 | -2.97                                                      | -29.26                             |                                                               |                                                             |                                                           |
| $2\text{-C1}(\text{F})\cdots\text{Na}^+$                 | -3559.12                                                 | -0.98                                                  | -696.68                            | -9.13                                                 | 248.18                                              | -1.16                              | -43145.95                                                 | -4.77                                                      | -46.66                             |                                                               |                                                             |                                                           |
| $2\text{-C2}(\text{F})\cdots\text{Na}^+$                 | -3563.79                                                 | -0.97                                                  | -696.80                            | -9.12                                                 | 246.44                                              | -1.15                              | -43145.31                                                 | -4.77                                                      | -46.63                             |                                                               |                                                             |                                                           |
| $2\text{-C3}(\text{F})\cdots\text{Na}^+$                 | -3562.87                                                 | -0.99                                                  | -696.96                            | -9.05                                                 | 247.96                                              | -1.21                              | -43145.40                                                 | -4.81                                                      | -47.09                             |                                                               |                                                             |                                                           |
| $2\text{-C4}(\text{F})\cdots\text{Na}^+$                 | -3570.09                                                 | -1.51                                                  | -676.66                            | -7.94                                                 | 232.76                                              | -1.84                              | -43146.99                                                 | -4.79                                                      | -46.91                             |                                                               |                                                             |                                                           |
| $2\text{-N}(\text{F})\cdots\text{Na}^+$                  | -3564.87                                                 | -0.99                                                  | -697.92                            | -9.06                                                 | 244.27                                              | -1.15                              | -43143.78                                                 | -4.75                                                      | -46.44                             |                                                               |                                                             |                                                           |





Table ST4: IQA components of complexes of the cyano-substituted 1,2-azaborines with  $\text{Na}^+$  calculated from the  $\sigma$ ,  $\pi$ , and  $\text{Na}^+$  parts of the total HF densities.

| Complexes                    | $\sigma$                                                 |                                                        |                                                        | $\pi$                                                 |                                                     |                                                     | $\sigma/\pi$                                              |                                                            |                                                            | cation                                                        |                                                             |                                                           |
|------------------------------|----------------------------------------------------------|--------------------------------------------------------|--------------------------------------------------------|-------------------------------------------------------|-----------------------------------------------------|-----------------------------------------------------|-----------------------------------------------------------|------------------------------------------------------------|------------------------------------------------------------|---------------------------------------------------------------|-------------------------------------------------------------|-----------------------------------------------------------|
|                              | $E_{\text{ne+C}(\sigma)}^{\text{Ring}\cdots\text{Na}^+}$ | $E_{\text{XC}(\sigma)}^{\text{Ring}\cdots\text{Na}^+}$ | $E_{\text{XC}(\sigma)}^{\text{Ring}\cdots\text{Na}^+}$ | $E_{\text{ne+C}(\pi)}^{\text{Ring}\cdots\text{Na}^+}$ | $E_{\text{XC}(\pi)}^{\text{Ring}\cdots\text{Na}^+}$ | $E_{\text{XC}(\pi)}^{\text{Ring}\cdots\text{Na}^+}$ | $E_{\text{C}(\sigma/\pi)}^{\text{Ring}\cdots\text{Na}^+}$ | $E_{\text{XC}(\sigma/\pi)}^{\text{Ring}\cdots\text{Na}^+}$ | $E_{\text{XC}(\sigma/\pi)}^{\text{Ring}\cdots\text{Na}^+}$ | $E_{\text{ne+C}(\text{Na}^+)}^{\text{Ring}\cdots\text{Na}^+}$ | $E_{\text{XC}(\text{Na}^+)}^{\text{Ring}\cdots\text{Na}^+}$ | $E_{\text{en}(\text{CI})}^{\text{Ring}\cdots\text{Na}^+}$ |
| 2-B(CN) $\cdots\text{Na}^+$  | -3644.63                                                 | -0.95                                                  | -687.04                                                | -687.04                                               | -8.92                                               | -8.92                                               | 251.56                                                    | -1.32                                                      | -1.32                                                      | -43143.76                                                     | -4.81                                                       | -47.08                                                    |
| 2-C1(CN) $\cdots\text{Na}^+$ | -3619.55                                                 | -0.96                                                  | -693.13                                                | -693.13                                               | -8.90                                               | -8.90                                               | 245.69                                                    | -1.13                                                      | -1.13                                                      | -43141.08                                                     | -4.81                                                       | -47.05                                                    |
| 2-C2(CN) $\cdots\text{Na}^+$ | -3617.29                                                 | -1.00                                                  | -691.18                                                | -691.18                                               | -8.73                                               | -8.73                                               | 242.01                                                    | -1.16                                                      | -1.16                                                      | -43139.60                                                     | -4.75                                                       | -46.52                                                    |
| 2-C3(CN) $\cdots\text{Na}^+$ | -3615.95                                                 | -0.99                                                  | -692.53                                                | -692.53                                               | -8.66                                               | -8.66                                               | 241.17                                                    | -1.20                                                      | -1.20                                                      | -43139.43                                                     | -4.77                                                       | -46.71                                                    |
| 2-C4(CN) $\cdots\text{Na}^+$ | -3618.31                                                 | -0.96                                                  | -687.58                                                | -687.58                                               | -8.58                                               | -8.58                                               | 242.68                                                    | -1.24                                                      | -1.24                                                      | -43136.91                                                     | -4.76                                                       | -46.63                                                    |
| 2-N(CN) $\cdots\text{Na}^+$  | -3659.92                                                 | -1.05                                                  | -689.80                                                | -689.80                                               | -8.54                                               | -8.54                                               | 243.43                                                    | -1.37                                                      | -1.37                                                      | -43141.33                                                     | -4.78                                                       | -46.83                                                    |







Table ST6: IQA components of complexes of the amino-substituted 1,2-azaborines with  $\text{Na}^+$  calculated from the  $\sigma$ ,  $\pi$ , and  $\text{Na}^+$  parts of the total HF densities.

| Complexes                                 | $\sigma$                                                 |                                                        |                                                        | $\pi$                                                 |                                                     |                                                     | $\sigma/\pi$                                              |                                                            |                                                            | cation                                                        |                                                             |                                                           |
|-------------------------------------------|----------------------------------------------------------|--------------------------------------------------------|--------------------------------------------------------|-------------------------------------------------------|-----------------------------------------------------|-----------------------------------------------------|-----------------------------------------------------------|------------------------------------------------------------|------------------------------------------------------------|---------------------------------------------------------------|-------------------------------------------------------------|-----------------------------------------------------------|
|                                           | $E_{\text{ne+C}(\sigma)}^{\text{Ring}\cdots\text{Na}^+}$ | $E_{\text{XC}(\sigma)}^{\text{Ring}\cdots\text{Na}^+}$ | $E_{\text{XC}(\sigma)}^{\text{Ring}\cdots\text{Na}^+}$ | $E_{\text{ne+C}(\pi)}^{\text{Ring}\cdots\text{Na}^+}$ | $E_{\text{XC}(\pi)}^{\text{Ring}\cdots\text{Na}^+}$ | $E_{\text{XC}(\pi)}^{\text{Ring}\cdots\text{Na}^+}$ | $E_{\text{C}(\sigma/\pi)}^{\text{Ring}\cdots\text{Na}^+}$ | $E_{\text{XC}(\sigma/\pi)}^{\text{Ring}\cdots\text{Na}^+}$ | $E_{\text{XC}(\sigma/\pi)}^{\text{Ring}\cdots\text{Na}^+}$ | $E_{\text{ne+C}(\text{Na}^+)}^{\text{Ring}\cdots\text{Na}^+}$ | $E_{\text{XC}(\text{Na}^+)}^{\text{Ring}\cdots\text{Na}^+}$ | $E_{\text{en}(\text{CI})}^{\text{Ring}\cdots\text{Na}^+}$ |
| 2-B( $\text{NH}_2$ ) $\cdots\text{Na}^+$  | -3617.79                                                 | -1.00                                                  | -704.48                                                | -9.15                                                 | 252.04                                              | -1.14                                               | -43146.05                                                 | -4.76                                                      | -46.56                                                     |                                                               |                                                             |                                                           |
| 2-C1( $\text{NH}_2$ ) $\cdots\text{Na}^+$ | -3570.63                                                 | -1.00                                                  | -704.93                                                | -9.31                                                 | 252.07                                              | -1.17                                               | -43151.81                                                 | -4.83                                                      | -47.29                                                     |                                                               |                                                             |                                                           |
| 2-C2( $\text{NH}_2$ ) $\cdots\text{Na}^+$ | -3579.13                                                 | -0.95                                                  | -700.85                                                | -9.32                                                 | 255.48                                              | -1.19                                               | -43152.06                                                 | -4.83                                                      | -47.23                                                     |                                                               |                                                             |                                                           |
| 2-C3( $\text{NH}_2$ ) $\cdots\text{Na}^+$ | -3570.90                                                 | -1.01                                                  | -703.25                                                | -9.35                                                 | 260.40                                              | -1.29                                               | -43158.24                                                 | -4.85                                                      | -47.41                                                     |                                                               |                                                             |                                                           |
| 2-C4( $\text{NH}_2$ ) $\cdots\text{Na}^+$ | -3586.51                                                 | -1.66                                                  | -671.06                                                | -7.78                                                 | 237.82                                              | -2.16                                               | -43157.53                                                 | -4.86                                                      | -47.55                                                     |                                                               |                                                             |                                                           |
| 2-N( $\text{NH}_2$ ) $\cdots\text{Na}^+$  | -3591.37                                                 | -1.23                                                  | -699.28                                                | -8.77                                                 | 247.27                                              | -1.47                                               | -43152.06                                                 | -4.86                                                      | -47.51                                                     |                                                               |                                                             |                                                           |

Table ST7: IQA components of complexes of the nitro-substituted 1,2-azaborines with  $\text{Na}^+$  calculated from the total  $(\sigma + \pi + \text{Na}^+)$  HF densities.

| Complexes                                             | Ring...Na <sup>+</sup>                           |                                                 |                                                 | $\Sigma \text{H} \dots \text{Na}^+$           |                                              |                                              | $\text{NO}_2 \dots \text{Na}^+$                  |                                                 |                                                 | Total                           |                                |                                |       |        |        |        |           |          |       |        |        |        |        |        |
|-------------------------------------------------------|--------------------------------------------------|-------------------------------------------------|-------------------------------------------------|-----------------------------------------------|----------------------------------------------|----------------------------------------------|--------------------------------------------------|-------------------------------------------------|-------------------------------------------------|---------------------------------|--------------------------------|--------------------------------|-------|--------|--------|--------|-----------|----------|-------|--------|--------|--------|--------|--------|
|                                                       | $E_{\text{int}}^{\text{Ring} \dots \text{Na}^+}$ | $E_{\text{CI}}^{\text{Ring} \dots \text{Na}^+}$ | $E_{\text{XC}}^{\text{Ring} \dots \text{Na}^+}$ | $E_{\text{int}}^{\text{H} \dots \text{Na}^+}$ | $E_{\text{CI}}^{\text{H} \dots \text{Na}^+}$ | $E_{\text{XC}}^{\text{H} \dots \text{Na}^+}$ | $E_{\text{int}}^{\text{NO}_2 \dots \text{Na}^+}$ | $E_{\text{CI}}^{\text{NO}_2 \dots \text{Na}^+}$ | $E_{\text{XC}}^{\text{NO}_2 \dots \text{Na}^+}$ | $E_{\text{int}}^{\text{Total}}$ | $E_{\text{CI}}^{\text{Total}}$ | $E_{\text{XC}}^{\text{Total}}$ |       |        |        |        |           |          |       |        |        |        |        |        |
| 2-B(NO <sub>2</sub> )...Na <sup>+</sup>               | -42.01                                           | -25.97                                          | -47276.25                                       | -90745.02                                     | 43468.77                                     | 47250.28                                     | -16.04                                           | 0.1549                                          | 84.14                                           | 84.30                           | -5225.40                       | 5309.70                        | -0.16 | 0.0027 | -72.36 | -72.25 | -19811.47 | 19739.22 | -0.11 | 0.0018 | -30.23 | -13.92 | -16.31 | 0.1594 |
| 2-CH(NO <sub>2</sub> )...Na <sup>+</sup>              | 7.36                                             | 23.06                                           | -47227.23                                       | -90184.41                                     | 42957.19                                     | 47250.28                                     | -15.70                                           | 0.1511                                          | 12.43                                           | 12.64                           | -5251.65                       | 5264.29                        | -0.21 | 0.0035 | -47.63 | -47.51 | -20482.42 | 20404.91 | -0.12 | 0.0023 | -27.85 | -11.81 | -16.04 | 0.1569 |
| 2-C <sub>2</sub> (NO <sub>2</sub> )...Na <sup>+</sup> | 6.23                                             | 21.79                                           | -47228.50                                       | -90194.19                                     | 42965.69                                     | 47250.28                                     | -15.56                                           | 0.1495                                          | 16.33                                           | 16.54                           | -5246.71                       | 5263.24                        | -0.20 | 0.0033 | -46.79 | -49.64 | -20454.15 | 20404.51 | -0.15 | 0.0028 | -27.22 | -11.31 | -15.91 | 0.1555 |
| 2-C <sub>3</sub> (NO <sub>2</sub> )...Na <sup>+</sup> | 1.84                                             | 17.41                                           | -47232.87                                       | -90247.51                                     | 43014.63                                     | 47250.28                                     | -15.57                                           | 0.1495                                          | 15.79                                           | 15.99                           | -5252.37                       | 5268.36                        | -0.20 | 0.0033 | -46.03 | -45.89 | -20329.37 | 20283.49 | -0.14 | 0.0026 | -28.40 | -12.48 | -15.91 | 0.1554 |
| 2-C <sub>4</sub> (NO <sub>2</sub> )...Na <sup>+</sup> | 10.42                                            | 25.85                                           | -47224.43                                       | -90155.45                                     | 42931.02                                     | 47250.28                                     | -15.43                                           | 0.1475                                          | 15.76                                           | 15.94                           | -5264.07                       | 5280.00                        | -0.18 | 0.0029 | -51.76 | -51.57 | -20183.79 | 20182.23 | -0.19 | 0.0035 | -25.58 | -9.77  | -15.80 | 0.1539 |
| 2-N(NO <sub>2</sub> )...Na <sup>+</sup>               | -8.31                                            | 7.46                                            | -47242.82                                       | -90350.86                                     | 43108.04                                     | 47250.28                                     | -15.78                                           | 0.1521                                          | -23.28                                          | -23.05                          | -5270.75                       | 5247.70                        | -0.23 | 0.0038 | 1.22   | 1.30   | -20526.18 | 20527.48 | -0.07 | 0.0014 | -30.36 | -14.29 | -16.07 | 0.1574 |

Table ST8: IQA components of complexes of the nitro-substituted 1,2-azaborines with  $\text{Na}^+$  calculated from the  $\sigma$ ,  $\pi$  and  $\text{Na}^+$  parts of the total HF densities.

| Complexes                                 | $\sigma$                                                 |                                                        | $\pi$                                                 |                                                     | $\sigma/\pi$                                              |                                                            | cation                                                        |                                                             |
|-------------------------------------------|----------------------------------------------------------|--------------------------------------------------------|-------------------------------------------------------|-----------------------------------------------------|-----------------------------------------------------------|------------------------------------------------------------|---------------------------------------------------------------|-------------------------------------------------------------|
|                                           | $E_{\text{ne+C}(\sigma)}^{\text{Ring}\cdots\text{Na}^+}$ | $E_{\text{XC}(\sigma)}^{\text{Ring}\cdots\text{Na}^+}$ | $E_{\text{ne+C}(\pi)}^{\text{Ring}\cdots\text{Na}^+}$ | $E_{\text{XC}(\pi)}^{\text{Ring}\cdots\text{Na}^+}$ | $E_{\text{C}(\sigma/\pi)}^{\text{Ring}\cdots\text{Na}^+}$ | $E_{\text{XC}(\sigma/\pi)}^{\text{Ring}\cdots\text{Na}^+}$ | $E_{\text{ne+C}(\text{Na}^+)}^{\text{Ring}\cdots\text{Na}^+}$ | $E_{\text{XC}(\text{Na}^+)}^{\text{Ring}\cdots\text{Na}^+}$ |
| 2-B( $\text{NO}_2$ ) $\cdots\text{Na}^+$  | -3639.66                                                 | -0.93                                                  | -695.49                                               | -9.12                                               | 249.88                                                    | -1.15                                                      | -43143.10                                                     | -4.84                                                       |
| 2-C1( $\text{NO}_2$ ) $\cdots\text{Na}^+$ | -3594.69                                                 | -1.02                                                  | -692.58                                               | -8.81                                               | 247.07                                                    | -1.14                                                      | -43140.26                                                     | -4.73                                                       |
| 2-C2( $\text{NO}_2$ ) $\cdots\text{Na}^+$ | -3596.98                                                 | -0.91                                                  | -690.07                                               | -8.74                                               | 243.30                                                    | -1.13                                                      | -43137.33                                                     | -4.78                                                       |
| 2-C3( $\text{NO}_2$ ) $\cdots\text{Na}^+$ | -3597.70                                                 | -0.92                                                  | -695.02                                               | -8.69                                               | 242.85                                                    | -1.13                                                      | -43135.17                                                     | -4.83                                                       |
| 2-C4( $\text{NO}_2$ ) $\cdots\text{Na}^+$ | -3593.17                                                 | -0.93                                                  | -689.07                                               | -8.59                                               | 238.82                                                    | -1.13                                                      | -43133.84                                                     | -4.77                                                       |
| 2-N( $\text{NO}_2$ ) $\cdots\text{Na}^+$  | -3607.26                                                 | -1.01                                                  | -690.09                                               | -8.82                                               | 242.57                                                    | -1.18                                                      | -43140.92                                                     | -4.76                                                       |



Table ST10: IQA components of complexes of the hydroxy-substituted 1,2-azaborines with  $\text{Na}^+$  calculated from the  $\sigma$ ,  $\pi$ , and  $\text{Na}^+$  parts of the total HF densities.

| Complexes                    | $\sigma$                                                 |                                                        |                                                        | $\pi$                                                 |                                                     |                                                     | $\sigma/\pi$                                              |                                                            |                                                            | cation                                                        |                                                             |                                                           |
|------------------------------|----------------------------------------------------------|--------------------------------------------------------|--------------------------------------------------------|-------------------------------------------------------|-----------------------------------------------------|-----------------------------------------------------|-----------------------------------------------------------|------------------------------------------------------------|------------------------------------------------------------|---------------------------------------------------------------|-------------------------------------------------------------|-----------------------------------------------------------|
|                              | $E_{\text{ne+C}(\sigma)}^{\text{Ring}\cdots\text{Na}^+}$ | $E_{\text{XC}(\sigma)}^{\text{Ring}\cdots\text{Na}^+}$ | $E_{\text{XC}(\sigma)}^{\text{Ring}\cdots\text{Na}^+}$ | $E_{\text{ne+C}(\pi)}^{\text{Ring}\cdots\text{Na}^+}$ | $E_{\text{XC}(\pi)}^{\text{Ring}\cdots\text{Na}^+}$ | $E_{\text{XC}(\pi)}^{\text{Ring}\cdots\text{Na}^+}$ | $E_{\text{C}(\sigma/\pi)}^{\text{Ring}\cdots\text{Na}^+}$ | $E_{\text{XC}(\sigma/\pi)}^{\text{Ring}\cdots\text{Na}^+}$ | $E_{\text{XC}(\sigma/\pi)}^{\text{Ring}\cdots\text{Na}^+}$ | $E_{\text{ne+C}(\text{Na}^+)}^{\text{Ring}\cdots\text{Na}^+}$ | $E_{\text{XC}(\text{Na}^+)}^{\text{Ring}\cdots\text{Na}^+}$ | $E_{\text{en}(\text{CI})}^{\text{Ring}\cdots\text{Na}^+}$ |
| 2-B(OH) $\cdots\text{Na}^+$  | -3620.05                                                 | -1.00                                                  | -701.81                                                | -9.21                                                 | 250.54                                              | -1.15                                               | -43146.70                                                 | -4.78                                                      | -46.80                                                     |                                                               |                                                             |                                                           |
| 2-C1(OH) $\cdots\text{Na}^+$ | -3561.30                                                 | -0.95                                                  | -699.05                                                | -9.27                                                 | 249.74                                              | -1.15                                               | -43149.31                                                 | -4.81                                                      | -47.05                                                     |                                                               |                                                             |                                                           |
| 2-C2(OH) $\cdots\text{Na}^+$ | -3566.67                                                 | -0.97                                                  | -697.44                                                | -9.23                                                 | 250.33                                              | -1.18                                               | -43150.01                                                 | -4.81                                                      | -47.11                                                     |                                                               |                                                             |                                                           |
| 2-C3(OH) $\cdots\text{Na}^+$ | -3564.80                                                 | -0.95                                                  | -699.67                                                | -9.35                                                 | 254.77                                              | -1.17                                               | -43152.94                                                 | -4.82                                                      | -47.23                                                     |                                                               |                                                             |                                                           |
| 2-C4(OH) $\cdots\text{Na}^+$ | -3568.48                                                 | -0.94                                                  | -695.72                                                | -9.24                                                 | 251.98                                              | -1.25                                               | -43152.49                                                 | -4.85                                                      | -47.47                                                     |                                                               |                                                             |                                                           |
| 2-N(OH) $\cdots\text{Na}^+$  | -3582.09                                                 | -0.94                                                  | -701.47                                                | -9.21                                                 | 251.02                                              | -1.21                                               | -43149.01                                                 | -4.87                                                      | -47.67                                                     |                                                               |                                                             |                                                           |









Table ST12: IQA components of complexes of benzene and its substituted derivatives with  $\text{Na}^+$  from the  $\sigma$ ,  $\pi$ , and  $\text{Na}^+$  parts of the total HF densities.

| Complexes                           | $\sigma$                                                 |                                                        | $\pi$                                                 |                                                     | $\sigma/\pi$                                              |                                                            | cation                                                          |                                                             |
|-------------------------------------|----------------------------------------------------------|--------------------------------------------------------|-------------------------------------------------------|-----------------------------------------------------|-----------------------------------------------------------|------------------------------------------------------------|-----------------------------------------------------------------|-------------------------------------------------------------|
|                                     | $E_{\text{ne+C}(\sigma)}^{\text{Ring}\cdots\text{Na}^+}$ | $E_{\text{XC}(\sigma)}^{\text{Ring}\cdots\text{Na}^+}$ | $E_{\text{ne+C}(\pi)}^{\text{Ring}\cdots\text{Na}^+}$ | $E_{\text{XC}(\pi)}^{\text{Ring}\cdots\text{Na}^+}$ | $E_{\text{C}(\sigma/\pi)}^{\text{Ring}\cdots\text{Na}^+}$ | $E_{\text{XC}(\sigma/\pi)}^{\text{Ring}\cdots\text{Na}^+}$ | $E_{\text{ne+C}(\text{cation})}^{\text{Ring}\cdots\text{Na}^+}$ | $E_{\text{XC}(\text{Na}^+)}^{\text{Ring}\cdots\text{Na}^+}$ |
| Benzene $\cdots\text{Na}^+$         | -3698.46                                                 | -0.88                                                  | -695.54                                               | -9.91                                               | 269.54                                                    | -1.18                                                      | -43231.35                                                       | -4.99                                                       |
| Benzene $\cdots\text{Na}^+$ (2.5 Å) | -3568.85                                                 | -0.67                                                  | -676.89                                               | -8.51                                               | 230.75                                                    | -0.90                                                      | -41794.83                                                       | -3.84                                                       |
| Ben-F $\cdots\text{Na}^+$           | -3614.69                                                 | -0.86                                                  | -700.11                                               | -9.71                                               | 260.69                                                    | -1.17                                                      | -43226.52                                                       | -5.05                                                       |
| Ben-CN $\cdots\text{Na}^+$          | -3672.03                                                 | -0.85                                                  | -695.24                                               | -9.41                                               | 258.09                                                    | -1.15                                                      | -43221.33                                                       | -4.96                                                       |
| Ben-NH2 $\cdots\text{Na}^+$         | -3621.65                                                 | -0.87                                                  | -706.75                                               | -9.96                                               | 268.78                                                    | -1.18                                                      | -43235.14                                                       | -5.04                                                       |
| Ben-NO2 $\cdots\text{Na}^+$ (2.5 Å) | -3522.77                                                 | -0.62                                                  | -678.48                                               | -8.00                                               | 223.60                                                    | -0.88                                                      | -41783.84                                                       | -3.86                                                       |
| Ben-OH $\cdots\text{Na}^+$          | -3608.09                                                 | -1.19                                                  | -698.27                                               | -9.06                                               | 254.11                                                    | -1.63                                                      | -43231.43                                                       | -5.06                                                       |
